# Supplementary material for: Investigation of the October effect in very low-frequency (VLF) signals
Source: Copernicus journal article supplement (doi:10.5194/angeo-43-55-2025), 2025-01-15
Supplement: Supplementary file 1 [file angeo-43-55-2025-supplement.zip]

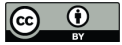

## *Supplement of*

# **Investigation of the October effect in very low-frequency (VLF) signals**

**Marc Hansen et al.**

*Correspondence to:* Marc Hansen ([marc.hansen@dlr.de](mailto:marc.hansen@dlr.de))

- [angeo-43-55-2025-supplement-title-page.pdf](#)
- [NAA-NTZ\\_2014\\_amplitude\\_color\\_data\\_10min\\_median.h5](#)
- [NAA-NTZ\\_2015\\_amplitude\\_color\\_data\\_10min\\_median.h5](#)
- [NAA-NTZ\\_2017\\_amplitude\\_color\\_data\\_10min\\_median.h5](#)
- [README.txt](#)

The copyright of individual parts of the supplement might differ from the article licence.
